# Supplementary material for: Aerosol modelling in Europe with a focus on Switzerland during summer and winter episodes
Source: Copernicus journal article supplement (doi:10.5194/acp-11-7355-2011), 2011-07-26
Supplement: Supplementary file 1 [file acp-11-7355-2011-supplement.pdf]

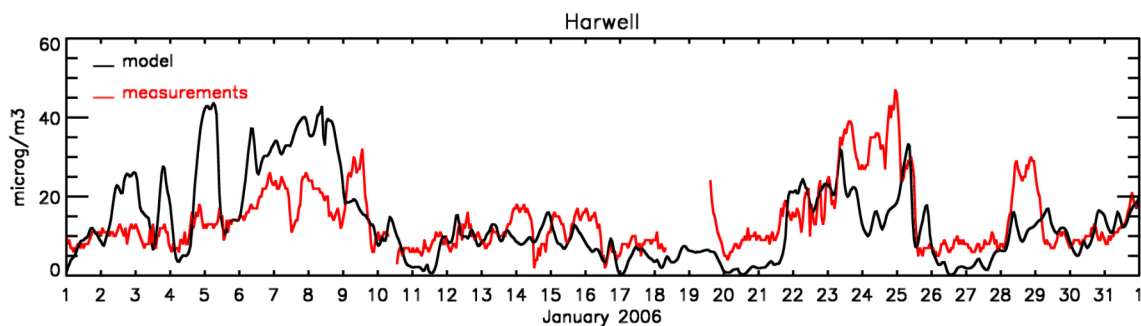

Figure S1. Comparison of modelled  $PM_{2.5}$  (27 km resolution) with measurements at Harwell (UK) in January 2006.

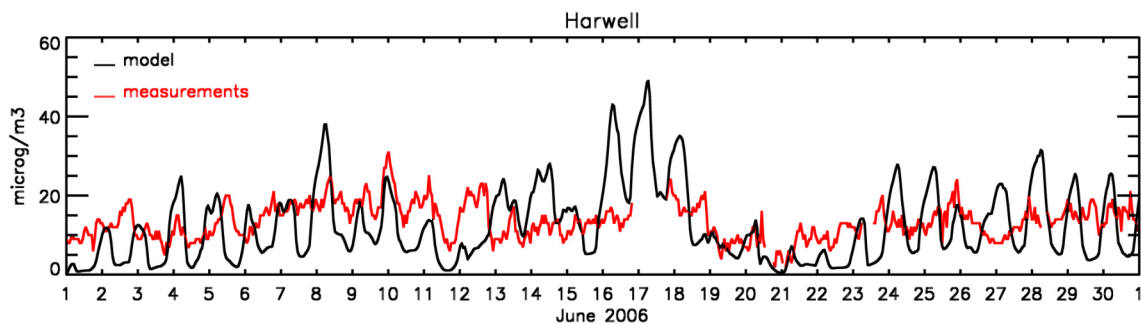

Figure S2. Comparison of modelled  $PM_{2.5}$  (27 km resolution) with measurements at Harwell (UK) in June 2006.

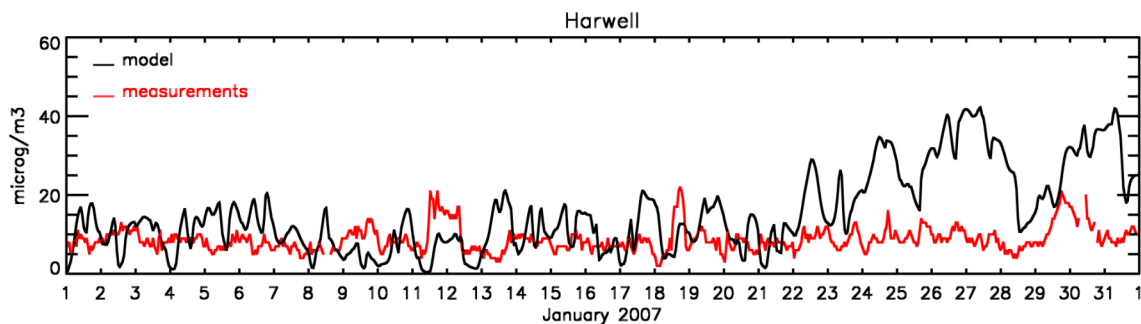

Figure S3. Comparison of modelled  $PM_{2.5}$  (27 km resolution) with measurements at Harwell (UK) in January 2007.

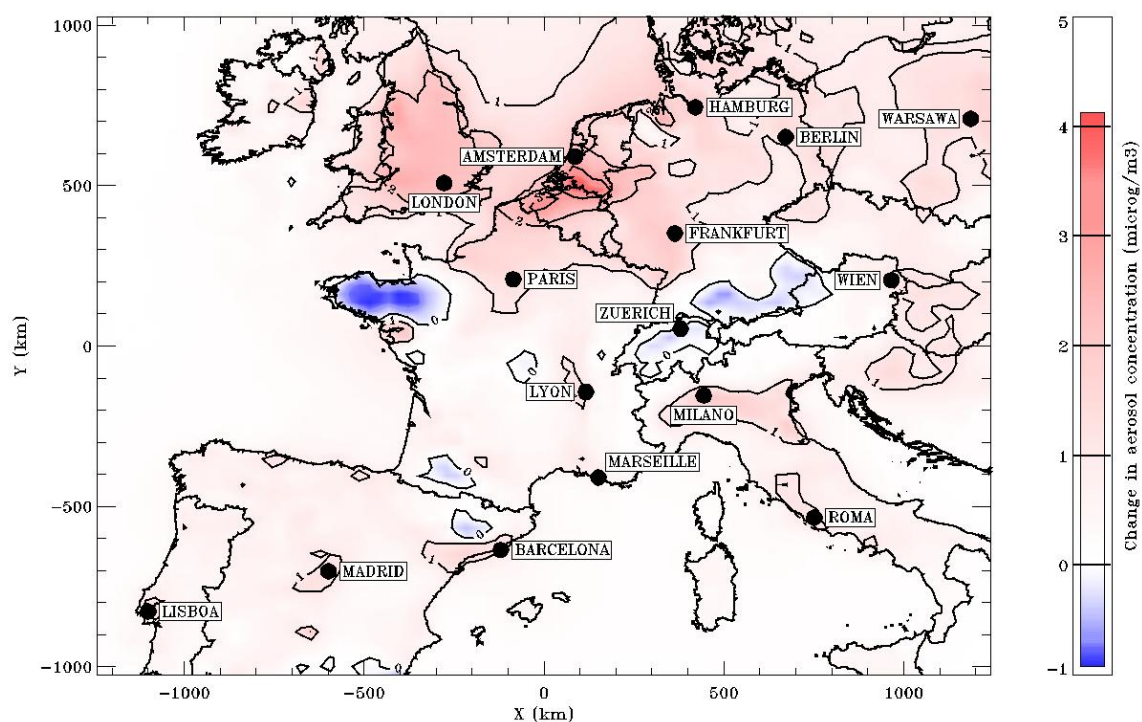

Figure S4. Difference in monthly average aerosol concentration ( $\mu\text{g m}^{-3}$ ) between two simulations with a 15% emission reduction of either  $\text{NO}_x$  or  $\text{NH}_3$  in January 2006 for the European domain. Aerosol formation is more sensitive to  $\text{NO}_x$  emissions in blue regions and more sensitive to  $\text{NH}_3$  emissions in red regions.

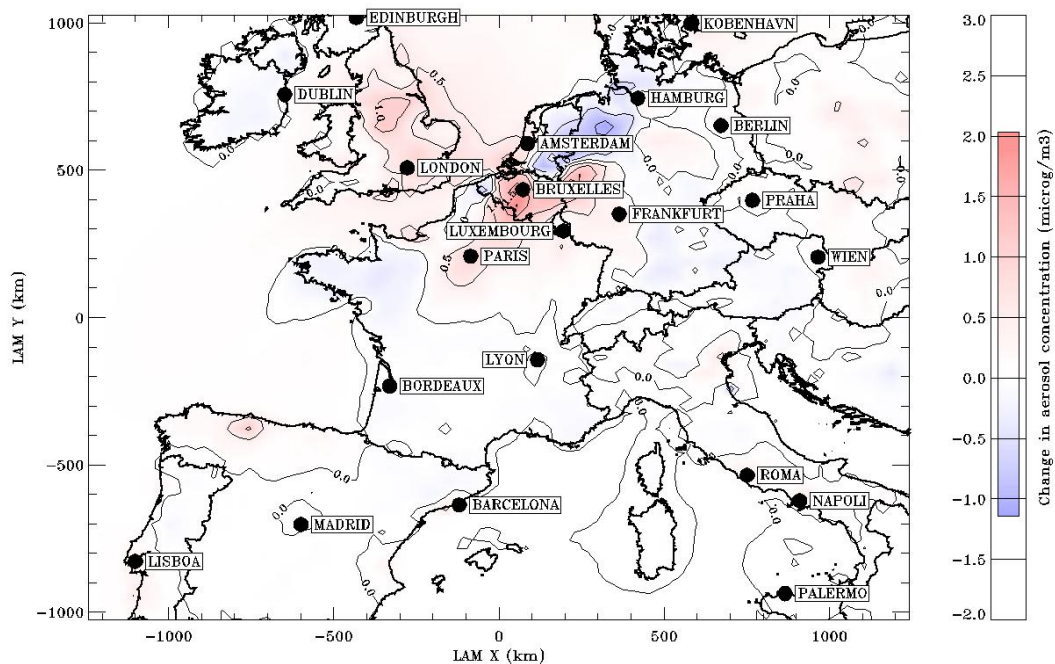

Figure S5. Difference in monthly average aerosol concentration ( $\mu\text{g m}^{-3}$ ) between two simulations with a 15% emission reduction of either  $\text{NO}_x$  or  $\text{NH}_3$  in June 2006 for the European domain. Aerosol formation is more sensitive to  $\text{NO}_x$  emissions in blue regions and more sensitive to  $\text{NH}_3$  emissions in red regions.
